# Supplementary material for: Operant behavior is reliably impaired in a mouse model of Angelman syndrome
Source: Research Square preprint supplement (doi:10.21203/rs.3.rs-9043922/v1), 2026-03-20
Supplement: Supplementary file 1 [file 210b514b19e3a798413dc7df.xlsx]

## Sheet: Fig 1C
Magazine training
unpaired t-test
P value	0.2202
t, df	t = 1.240, df = 54
R squared	0.02771

## Sheet: Fig 1E
Acquisition: days to criteria
unpaired t-test
P value	0.003
t, df	t = 3.113, df = 54
R squared	0.1521

## Sheet: Fig 1F
Acquisition: cued responses at criteria
unpaired t-test
P value	0.002
t, df	t = 3.245, df = 54
R squared	0.1632

## Sheet: Fig 1G
Acquisition: non-cued responses at criteria
unpaired t-test
P value	<0.0001
t, df	t = 4.240, df = 54
R squared	0.2498

## Sheet: Fig 1H
Acquisition: accuracy at criteria
unpaired t-test
P value	0.0014
t, df	t = 3.380, df = 54
R squared	0.1746

## Sheet: Fig 1I
Extinction: cued responses (normalized to acquisition)
Two-way ANOVA
Source of Variation	% of total variation	P value	P value summary
Time x Genotype	2.537	0.005	**
Time	41.93	<0.0001	****
Genotype	3.004	0.0169	*
Subject	26.69	0.0003	***
Multiple comparisons
Šídák's multiple comparisons test	Mean diff.	95.00% CI of diff.	Below threshold?	Summary	Adjusted P Value
WT - AS
E1	41.18	10.65 to 71.70	Yes	**	0.0048
E2	1.382	-22.44 to 25.20	No	ns	0.9985
E3	12.26	-7.783 to 32.31	No	ns	0.3583

## Sheet: Fig 1K
Extinction: non-cued responses (normalized to acquisition)
Two-way ANOVA
Source of Variation	% of total variation	P value	P value summary
Day x Genotype	0.4026	0.6193	ns
Day	0.7479	0.4247	ns
Genotype	1.26	0.2469	ns
Subject	49.65	0.0007	***
Multiple comparisons
Šídák's multiple comparisons test	Mean diff.	95.00% CI of diff.	Below threshold?	Summary	Adjusted P Value
WT - AS
E1	69.96	-58.98 to 198.9	No	ns	0.4623
E2	10.71	-124.2 to 145.6	No	ns	0.9962
E3	49.95	-70.19 to 170.1	No	ns	0.6688

## Sheet: Fig 1M
Extinction: accuracy (normalized to acquisition)
Two-way ANOVA
Source of Variation	% of total variation	P value	P value summary
Time x Genotype	1.042	0.2447	ns
Time	18.35	<0.0001	****
Genotype	1.198	0.2042	ns
Subject	39.18	<0.0001	****
Multiple comparisons
Šídák's multiple comparisons test	Mean diff.	95.00% CI of diff.	Below threshold?	Summary	Adjusted P Value
WT - AS
ACQ	6.667e-10	-0.02975 to 0.02975	No	ns	>0.9999
E1	-0.01387	-0.06550 to 0.03776	No	ns	0.9333
E2	-0.0584	-0.1474 to 0.03064	No	ns	0.3335
E3	-0.02053	-0.09459 to 0.05352	No	ns	0.9256

## Sheet: Fig 2A
Acquisition: days to criteria (by cohort)
Two-way ANOVA
Source of Variation	% of total variation	P value	P value summary
Interaction	1.855	0.2848	ns
Cohort	0.192	0.7295	ns
Genotype	16.49	0.0022	**
Multiple comparisons
Šídák's multiple comparisons test	Predicted (LS) Mean diff.	95.00% CI of diff.	Below threshold?	Summary	Adjusted P Value
WT - AS
Cohort 1	-8.573	-15.51 to -1.632	Yes	*	0.0127
Cohort 2	-4.267	-10.27 to 1.735	No	ns	0.2037

## Sheet: Fig 2B
Acquisition: accuracy at criteria (by cohort)
Two-way ANOVA
Source of Variation	% of total variation	P value	P value summary
Interaction	1.251	0.3642	ns
Cohort	3.961	0.1094	ns
Genotype	18.63	0.0009	***
Multiple comparisons
Šídák's multiple comparisons test	Predicted (LS) Mean diff.	95.00% CI of diff.	Below threshold?	Summary	Adjusted P Value
WT - AS
Cohort 1	-4.732	-8.438 to -1.025	Yes	**	0.0098
Cohort 2	-2.784	-5.989 to 0.4209	No	ns	0.0988

[truncated: 16 more sheets: Fig 2C, Fig 2D, Fig 2E, Fig 2F, Fig 3A, Fig 3B, Fig 3C, Fig 3D, Fig 3E, Fig 3F, Fig 4D, Fig 4E, Fig 4F, Fig S1A, Fig S1C, Fig S1E]
