# Supplementary material for: Operant behavior is reliably impaired in a mouse model of Angelman syndrome
Source: Research Square preprint supplement (doi:10.21203/rs.3.rs-9043922/v1), 2026-03-20
Supplement: Supplementary file 2 [file 3d51844e5c8120eacbf296ba.xlsx]

## Sheet: Fig 1C
Magazine training
Mouse ID	Genotype	Pellets received (Day 1)	Pellets received (Day 2)	Average
A1-1	AS	15	22	18.5
A1-2	AS	19	17	18
A1-3	AS	14	12	13
A1-4	AS	4	9	6.5
A2-1	AS	15	25	20
A2-2	WT	13	25	19
A2-3	WT	20	23	21.5
A2-4	WT	26	14	20
A3-1	AS	11	20	15.5
A3-2	WT	5	12	8.5
A3-3	AS	9	15	12
A3-4	AS	8	15	11.5
A4-1	WT	7	11	9
A4-2	AS	7	16	11.5
A4-3	AS	14	19	16.5
A4-4	AS	19	30	24.5
A5-1	WT	1	8	4.5
A5-2	WT	16	19	17.5
A5-3	WT	10	14	12
A5-4	WT	0	1	0.5
A6-1	WT	24	36	30
A6-2	WT	9	36	22.5
A6-3	WT	16	40	28
A6-4	WT	14	34	24
B1-1	AS	13	21	17
B1-2	WT	5	6	5.5
B1-3	WT	6	19	12.5
B1-4	AS	14	24	19
B2-1	WT	9	11	10
B2-2	AS	16	15	15.5
B2-3	WT	1	7	4
B2-4	WT	4	13	8.5
B3-1	WT	10	12	11
B3-2	AS	12	19	15.5
B3-3	AS	1	5	3
B3-4	WT	7	10	8.5
B4-1	WT	3	11	7
B4-2	AS	7	17	12
B4-3	AS	1	15	8
B4-4	AS	8	13	10.5
B5-1	AS	4	12	8
B5-2	WT	5	13	9
B5-3	WT	7	15	11
B5-4	AS	13	24	18.5
B6-1	WT	6	11	8.5
B6-2	AS	9	11	10
B6-3	WT	7	12	9.5
B7-1	AS	22	29	25.5
B7-2	WT	3	9	6
B7-3	WT	0	6	3
B8-1	AS	7	14	10.5
B8-2	WT	8	7	7.5
B8-3	WT	3	10	6.5
B9-1	AS	11	26	18.5
B9-2	AS	8	18	13
B9-3	WT	16	20	18

## Sheet: Fig 1D
Acquisition: learning curves (trials)
		Day
		1	2	3	4	5	6	7	8	9	10	11	12	13	14	15	16	17	18	19	20	21	22	23	24	25	26	27	28	29	30	31	32	33	34	35	36	37	38	39
Mouse ID	Genotype
A1-1	AS	7	5	3	3	2	1	2	3	2	3	3	4	2	6	7	14	16	17	19	13	21	19	21	20	24
A1-2	AS	5	1	6	3	4	6	7	4	11	19	25	26	24	29
A1-3	AS	6	4	4	7	4	5	3	5	2	9	7	8	7	10	13	13	21	12	10	9	11	12	9	7	13	14	15	23	16	25	28	29
A1-4	AS	8	4	3	5	8	4	7	11	15	18	19	16	20	23
A2-1	AS	11	11	5	7	12	14	16	22	21	23	25
A2-2	WT	8	8	13	18	17	21	17	32
A2-3	WT	11	9	3	5	3	4	4	8	12	17	26	26	26	38
A2-4	WT	4	3	2	4	5	10	16	28	27	30	34
A3-1	AS	7	3	3	2	4	8	8	18	19	24	24	23
A3-2	WT	4	7	3	6	4	10	7	16	19	18	18	12	16	17	23	23	29
A3-3	AS	6	4	7	7	1	3	2	3	5	1	2	4	2	2	2	4	3	2	7	5	5	3	5	4	5	3	7	10	9	12	19	28	29	21	19
A3-4	AS	6	3	4	3	7	3	5	2	6	6	5	6	6	12	14	17	19	18	20	21
A4-1	WT	3	5	3	6	4	4	6	10	10	12	13	14	18	24	23	22	27
A4-2	AS	6	2	1	2	1	1	4	3	1	2	2	5	2	3	4	4	5	5	3	8	3	11	12	17	14	20	24	23	21	22
A4-3	AS	5	3	3	1	3	2	2	3	2	2	2	3	1	3	3	2	2	1	2	2	2	2	3	7	7	10	13	14	14	12	19	14	14	16	17	36	24	25
A4-4	AS	9	4	6	4	3	5	1	5	2	2	3	1	2	3	1	1	1	2	3	2	3	5	11	22	22	28	42	26
A5-1	WT	6	3	7	7	3	6	5	9	7	7	11	11	9	18	20	18	26	26
A5-2	WT	8	4	4	4	3	3	1	2	10	6	13	11	13	23	25	18	26	29
A5-3	WT	6	2	5	1	4	4	4	5	7	5	5	6	7	11	16	22	20	15	14	13	8	10	5	7	7	15	19	15	18	16	22	30	22
A5-4	WT	3	7	4	3	5	4	10	13	20	25	21	22	15	17	38	28	29	28
A6-1	WT	8	5	2	4	8	13	17	24	28	22	26
A6-2	WT	7	5	10	11	5	9	11	16	22	26	26	27
A6-3	WT	6	6	7	5	7	13	18	21	24	37	40
A6-4	WT	10	5	9	14	25	30	22	32	39
B1-1	AS	13	5	2	6	3	5	3	2	4	7	2	4	4	7	13	20	20	22	25	31
B1-2	WT	5	5	5	5	4	14	11	9	11	17	22	17	25	20
B1-3	WT	4	4	4	4	4	4	4	6	4	12	16	23	25	17	19
B1-4	AS	5	2	3	4	5	6	7	7	8	12	14	19	11	20	11	20	20	23	17	20	25
B2-1	WT	3	4	3	6	6	4	5	4	5	10	6	10	14	15	17	23	23	23	24
B2-2	AS	3	3	5	6	3	9	5	5	4	7	6	9	7	9	11	11	10	11	12	17	13	16	18	20	23	31
B2-3	WT	4	6	8	4	5	5	3	4	5	6	4	6	8	13	14	21	21	23	26	21
B2-4	WT	3	4	2	3	4	2	1	3	2	2	3	4	9	6	9	12	16	22	25	21	14	17	27	27	34	30	33
B3-1	WT	7	8	6	5	6	6	8	8	16	16	16	13	18	17	12	18	19	21	18	18
B3-2	AS	5	7	5	4	3	4	8	3	6	9	8	7	3	10	8	8	10	12	8	11	12	7	12	8	12	14	10	12	11	10	14	12	14	15	20	19	25	20	14
B3-3	AS	4	3	5	3	6	2	6	8	8	15	16	17	15	18	19	19	22	23
B3-4	WT	5	5	4	6	5	8	5	8	11	16	12	13	17	15	13	16	17	14	24	25	17	21	22
B4-1	WT	4	5	4	1	7	15	11	11	15	16	16	15	20	17	15	13	18	20	17	24	16
B4-2	AS	5	3	3	4	3	4	3	6	3	5	6	5	5	5	7	11	9	11	12	19	20	17	17	18
B4-3	AS	8	6	3	4	6	5	6	6	10	13	16	14	18	20	17	16	19
B4-4	AS	3	2	2	2	2	4	2	4	3	4	4	4	3	5	6	4	11	12	14	13	10	10	13	10	16	20	23	28	23
B5-1	AS	10	8	4	9	4	6	7	14	16	19	21	24	20
B5-2	WT	5	2	4	6	6	4	7	11	10	12	16	19	21	25	21	21	26
B5-3	WT	3	5	5	6	5	5	4	9	13	21	22	19	20	14	21	22	19	27	19
B5-4	AS	4	2	1	2	2	3	2	1	1	3	1	2	2	2	2	1	4	1	3	1	4	7	4	5	10	16	16	12	14	13	16	13	18	20	19	17	23
B6-1	WT	3	3	7	1	3	7	11	11	11	16	15	18	13	18	13	19	15	19	22	19	19	18
B6-2	AS	6	5	3	4	1	2	4	2	3	4	5	7	7	11	11	13	16	17	22	17	21
B6-3	WT	5	2	3	3	3	3	6	4	8	13	12	15	15	18	14	18	19	20	23	22
B7-1	AS	8	5	2	4	4	1	2	4	4	18	21	20	25	24	26	27	30
B7-2	WT	7	3	4	11	15	23	22	24	21	28
B7-3	WT	6	4	4	4	4	11	17	17	27	30	29
B8-1	AS	5	2	6	6	6	8	13	15	17	22	22	20	22
B8-2	WT	4	6	7	5	5	11	4	4	5	9	8	12	14	13	10	17	17	12	16	15	17	22	25	17	31
B8-3	WT	4	4	3	3	4	7	10	10	18	22	21	18	22
B9-1	AS	7	5	2	5	6	5	12	8	14	19	17	17	16	17
B9-2	AS	0	2	1	2	2	4	6	6	10	15	18	15	15	14	14	21	20	17	15	25	17	17	24	25	27
B9-3	WT	6	6	6	8	15	25	19	27	23	29

## Sheet: Fig 1E
Acquisition: days to criteria
Mouse ID	Genotype	Days to criteria
A1-1	AS	25
A1-2	AS	14
A1-3	AS	32
A1-4	AS	14
A2-1	AS	11
A2-2	WT	8
A2-3	WT	14
A2-4	WT	11
A3-1	AS	12
A3-2	WT	17
A3-3	AS	35
A3-4	AS	20
A4-1	WT	17
A4-2	AS	30
A4-3	AS	38
A4-4	AS	28
A5-1	WT	18
A5-2	WT	18
A5-3	WT	33
A5-4	WT	18
A6-1	WT	11
A6-2	WT	12
A6-3	WT	11
A6-4	WT	9
B1-1	AS	20
B1-2	WT	14
B1-3	WT	15
B1-4	AS	21
B2-1	WT	19
B2-2	AS	26
B2-3	WT	20
B2-4	WT	27
B3-1	WT	20
B3-2	AS	39
B3-3	AS	18
B3-4	WT	23
B4-1	WT	21
B4-2	AS	24
B4-3	AS	17
B4-4	AS	29
B5-1	AS	13
B5-2	WT	17
B5-3	WT	19
B5-4	AS	37
B6-1	WT	22
B6-2	AS	21
B6-3	WT	20
B7-1	AS	17
B7-2	WT	10
B7-3	WT	11
B8-1	AS	13
B8-2	WT	25
B8-3	WT	13
B9-1	AS	14
B9-2	AS	25
B9-3	WT	10

## Sheet: Fig 1F
Acquisition: cued responses at criteria
Mouse ID	Genotype	Cued responses, at criteria day 1	Cued responses, at criteria day 2	Cued responses, at criteria day 3	Cued responses, at criteria day 4	Cued responses, at criteria day 5	Average
A1-1	AS	35	26	34	26	40	32.2
A1-2	AS	28	38	40	37	48	38.2
A1-3	AS	34	24	40	43	50	38.2
A1-4	AS	25	29	23	29	40	29.2
A2-1	AS	22	37	33	34	40	33.2
A2-2	WT	30	43	47	30	55	41
A2-3	WT	27	44	45	45	72	46.6
A2-4	WT	23	47	44	56	68	47.6
A3-1	AS	26	27	42	38	38	34.2
A3-2	WT	25	26	37	35	59	36.4
A3-3	AS	28	49	47	38	39	40.2
A3-4	AS	29	27	25	30	36	29.4
A4-1	WT	27	41	39	40	48	39
A4-2	AS	34	36	32	32	33	33.4
A4-3	AS	24	25	70	40	47	41.2
A4-4	AS	33	34	53	92	42	50.8
A5-1	WT	28	33	31	46	52	38
A5-2	WT	43	52	27	47	51	44
A5-3	WT	29	21	39	54	34	35.4
A5-4	WT	32	77	55	56	55	55
A6-1	WT	25	41	51	48	44	41.8
A6-2	WT	30	41	44	58	60	46.6
A6-3	WT	29	47	53	70	80	55.8
A6-4	WT	48	66	41	77	86	63.6
B1-1	AS	31	27	37	45	60	40
B1-2	WT	22	33	26	39	29	29.8
B1-3	WT	23	38	43	29	33	33.2
B1-4	AS	34	38	24	37	52	37
B2-1	WT	30	45	35	42	45	39.4
B2-2	AS	20	27	37	40	51	35
B2-3	WT	29	39	35	45	31	35.8
B2-4	WT	50	79	88	62	59	67.6
B3-1	WT	24	29	33	29	27	28.4
B3-2	AS	33	32	42	36	16	31.8
B3-3	AS	26	37	25	48	36	34.4
B3-4	WT	91	46	25	33	34	45.8
B4-1	WT	28	35	26	39	25	30.6
B4-2	AS	29	27	24	25	29	26.8
B4-3	AS	24	30	24	21	30	25.8
B4-4	AS	20	32	35	50	33	34
B5-1	AS	22	31	28	39	32	30.4
B5-2	WT	35	46	34	32	44	38.2
B5-3	WT	29	38	35	48	32	36.4
B5-4	AS	28	33	34	26	43	32.8
B6-1	WT	33	41	30	28	28	32
B6-2	AS	21	26	38	24	36	29
B6-3	WT	27	32	31	39	48	35.4
B7-1	AS	43	51	41	46	51	46.4
B7-2	WT	48	39	41	34	52	42.8
B7-3	WT	24	29	43	55	45	39.2
B8-1	AS	26	32	33	29	35	31
B8-2	WT	26	43	53	26	68	43.2
B8-3	WT	25	41	30	31	39	33.2
B9-1	AS	26	26	28	23	21	24.8
B9-2	AS	33	32	40	45	44	38.8
B9-3	WT	42	28	54	40	53	43.4

## Sheet: Fig 1G
Acquisition: non-cued responses at criteria
Mouse ID	Genotype	Non-cued responses, at criteria day 1	Non-cued responses, at criteria day 2	Non-cued responses, at criteria day 3	Non-cued responses, at criteria day 4	Non-cued responses, at criteria day 5	Average
A1-1	AS	3	3	1	1	1	1.8
A1-2	AS	6	2	2	0	2	2.4
A1-3	AS	1	1	3	1	2	1.6
A1-4	AS	2	2	3	0	1	1.6
A2-1	AS	0	1	0	0	0	0.2
A2-2	WT	9	8	3	3	4	5.4
A2-3	WT	8	10	8	1	2	5.8
A2-4	WT	3	0	3	1	0	1.4
A3-1	AS	3	1	3	4	0	2.2
A3-2	WT	3	0	3	1	8	3
A3-3	AS	3	0	0	3	1	1.4
A3-4	AS	1	3	3	3	4	2.8
A4-1	WT	6	0	1	3	1	2.2
A4-2	AS	2	2	3	0	2	1.8
A4-3	AS	1	3	0	0	1	1
A4-4	AS	7	0	1	9	1	3.6
A5-1	WT	7	2	2	3	3	3.4
A5-2	WT	8	6	5	7	5	6.2
A5-3	WT	7	4	3	6	5	5
A5-4	WT	9	9	7	3	5	6.6
A6-1	WT	3	6	2	2	3	3.2
A6-2	WT	8	8	9	16	11	10.4
A6-3	WT	3	5	9	3	2	4.4
A6-4	WT	3	5	2	3	7	4
B1-1	AS	7	3	7	12	4	6.6
B1-2	WT	6	4	3	9	7	5.8
B1-3	WT	6	8	9	11	10	8.8
B1-4	AS	5	4	4	2	10	5
B2-1	WT	3	3	3	1	3	2.6
B2-2	AS	3	7	6	3	0	3.8
B2-3	WT	1	4	5	7	2	3.8
B2-4	WT	5	8	5	3	1	4.4
B3-1	WT	2	5	4	3	8	4.4
B3-2	AS	3	4	8	7	6	5.6
B3-3	AS	3	2	3	1	4	2.6
B3-4	WT	13	1	0	2	0	3.2
B4-1	WT	2	0	0	6	7	3
B4-2	AS	2	7	0	2	0	2.2
B4-3	AS	1	1	3	5	1	2.2
B4-4	AS	0	0	1	1	1	0.6
B5-1	AS	1	1	2	2	1	1.4
B5-2	WT	7	2	8	2	4	4.6
B5-3	WT	8	4	3	5	6	5.2
B5-4	AS	2	2	3	3	7	3.4
B6-1	WT	3	2	2	4	2	2.6
B6-2	AS	0	0	2	0	2	0.8
B6-3	WT	5	4	2	12	4	5.4
B7-1	AS	6	9	5	3	4	5.4
B7-2	WT	5	2	2	4	1	2.8
B7-3	WT	4	2	4	3	4	3.4
B8-1	AS	2	2	0	1	0	1
B8-2	WT	6	5	8	5	5	5.8
B8-3	WT	3	5	7	4	9	5.6
B9-1	AS	1	3	0	2	0	1.2
B9-2	AS	0	0	2	9	2	2.6
B9-3	WT	2	3	6	5	2	3.6

## Sheet: Fig 1H
Acquisition: accuracy at criteria
Mouse ID	Genotype	Accuracy, at criteria day 1	Accuracy, at criteria day 2	Accuracy, at criteria day 3	Accuracy, at criteria day 4	Accuracy, at criteria day 5	Average
A1-1	AS	0.921053	0.896552	0.971429	0.962963	0.97561	0.945521
A1-2	AS	0.823529	0.95	0.952381	1	0.96	0.937182
A1-3	AS	0.971429	0.96	0.930233	0.977273	0.961538	0.960094
A1-4	AS	0.925926	0.935484	0.884615	1	0.97561	0.944327
A2-1	AS	1	0.973684	1	1	1	0.994737
A2-2	WT	0.769231	0.843137	0.94	0.909091	0.932203	0.878732
A2-3	WT	0.771429	0.814815	0.849057	0.978261	0.972973	0.877307
A2-4	WT	0.884615	1	0.93617	0.982456	1	0.960648
A3-1	AS	0.896552	0.964286	0.933333	0.904762	1	0.939787
A3-2	WT	0.892857	1	0.925	0.972222	0.880597	0.934135
A3-3	AS	0.903226	1	1	0.926829	0.975	0.961011
A3-4	AS	0.966667	0.9	0.892857	0.909091	0.9	0.913723
A4-1	WT	0.818182	1	0.975	0.930233	0.979592	0.940601
A4-2	AS	0.944444	0.947368	0.914286	1	0.942857	0.949791
A4-3	AS	0.96	0.892857	1	1	0.979167	0.966405
A4-4	AS	0.825	1	0.981481	0.910891	0.976744	0.938823
A5-1	WT	0.8	0.942857	0.939394	0.938776	0.945455	0.913296
A5-2	WT	0.843137	0.896552	0.84375	0.87037	0.910714	0.872905
A5-3	WT	0.805556	0.84	0.928571	0.9	0.871795	0.869184
A5-4	WT	0.780488	0.895349	0.887097	0.949153	0.916667	0.885751
A6-1	WT	0.892857	0.87234	0.962264	0.96	0.93617	0.924726
A6-2	WT	0.789474	0.836735	0.830189	0.783784	0.84507	0.81705
A6-3	WT	0.90625	0.903846	0.854839	0.958904	0.97561	0.91989
A6-4	WT	0.941176	0.929577	0.953488	0.9625	0.924731	0.942295
B1-1	AS	0.815789	0.9	0.840909	0.789474	0.9375	0.856734
B1-2	WT	0.785714	0.891892	0.896552	0.8125	0.805556	0.838443
B1-3	WT	0.793103	0.826087	0.826923	0.725	0.767442	0.787711
B1-4	AS	0.871795	0.904762	0.857143	0.948718	0.83871	0.884225
B2-1	WT	0.909091	0.9375	0.921053	0.976744	0.9375	0.936378
B2-2	AS	0.869565	0.794118	0.860465	0.930233	1	0.890876
B2-3	WT	0.966667	0.906977	0.875	0.865385	0.939394	0.910684
B2-4	WT	0.909091	0.908046	0.946237	0.953846	0.983333	0.940111
B3-1	WT	0.923077	0.852941	0.891892	0.90625	0.771429	0.869118
B3-2	AS	0.916667	0.888889	0.84	0.837209	0.727273	0.842008
B3-3	AS	0.896552	0.948718	0.892857	0.979592	0.9	0.923544
B3-4	WT	0.875	0.978723	1	0.942857	1	0.959316
B4-1	WT	0.933333	1	1	0.866667	0.78125	0.91625
B4-2	AS	0.935484	0.794118	1	0.925926	1	0.931105
B4-3	AS	0.96	0.967742	0.888889	0.807692	0.967742	0.918413
B4-4	AS	1	1	0.972222	0.980392	0.970588	0.984641
B5-1	AS	0.956522	0.96875	0.933333	0.95122	0.969697	0.955904
B5-2	WT	0.833333	0.958333	0.809524	0.941176	0.916667	0.891807
B5-3	WT	0.783784	0.904762	0.921053	0.90566	0.842105	0.871473
B5-4	AS	0.933333	0.942857	0.918919	0.896552	0.86	0.910332
B6-1	WT	0.916667	0.953488	0.9375	0.875	0.933333	0.923198
B6-2	AS	1	1	0.95	1	0.947368	0.979474
B6-3	WT	0.84375	0.888889	0.939394	0.764706	0.923077	0.871963
B7-1	AS	0.877551	0.85	0.891304	0.938776	0.927273	0.896981
B7-2	WT	0.90566	0.95122	0.953488	0.894737	0.981132	0.937247
B7-3	WT	0.857143	0.935484	0.914894	0.948276	0.918367	0.914833
B8-1	AS	0.928571	0.941176	1	0.966667	1	0.967283
B8-2	WT	0.8125	0.895833	0.868852	0.83871	0.931507	0.86948
B8-3	WT	0.892857	0.891304	0.810811	0.885714	0.8125	0.858637
B9-1	AS	0.962963	0.896552	1	0.92	1	0.955903
B9-2	AS	1	1	0.952381	0.833333	0.956522	0.948447
B9-3	WT	0.954545	0.903226	0.9	0.888889	0.963636	0.922059

## Sheet: Fig 1I-J
Extinction: cued responses (normalized to acquisition)
Mouse ID	Genotype	ACQ	E1	E2	E3
A1-1	AS	0.932086	1.12892	0.752616	1.15787
A1-2	AS	1.10577	2.11312	1.24471	0.781563
A1-3	AS	1.10577	1.01314	0.289468	0.0868403
A1-4	AS	0.845246	1.33155	0.984191	0.781563
A2-1	AS	0.961033	0.839457	0.607882	0.405255
A2-2	WT	0.987793	2.09605	0.987793	0.28911
A2-3	WT	1.12271	2.2647	1.301	0.867331
A2-4	WT	1.1468	2.21651	1.22872	0.915516
A3-1	AS	0.98998	0.868403	0.434202	0.260521
A3-2	WT	0.876968	2.36107	1.01189	0.626405
A3-3	AS	1.16366	0.926297	0.926297	0.694723
A3-4	AS	0.851035	1.85259	0.752616	0.781563
A4-1	WT	0.939608	1.87922	0.67459	0.650498
A4-2	AS	0.966823	1.21576	0.89735	0.607882
A4-3	AS	1.19261	1.33155	0.81051	0.318415
A4-4	AS	1.4705	1.47629	1.18682	0.72367
A5-1	WT	0.915516	1.49374	1.54192	0.48185
A5-2	WT	1.06007	1.97559	1.08416	0.77096
A5-3	WT	0.852875	0.891423	0.819146	0.313203
A5-4	WT	1.32509	1.63829	0.987793	1.10826
A6-1	WT	1.00707	0.867331	0.722775	0.48185
A6-2	WT	1.12271	1.56601	1.25281	0.361388
A6-3	WT	1.34436	1.83103	0.554128	0.67459
A6-4	WT	1.53228	2.55381	0.746868	0.819146
B1-1	AS	1.15787	1.88154	1.62102	0.984191
B1-2	WT	0.717957	0.939608	0.77096	1.06007
B1-3	WT	0.799872	2.40925	1.13235	0.57822
B1-4	AS	1.07103	1.70786	1.21576	0.0868403
B2-1	WT	0.949245	1.73466	1.59011	1.44555
B2-2	AS	1.01314	1.27366	0.955244	1.01314
B2-3	WT	0.862512	0.867331	0.795053	0.337295
B2-4	WT	1.62865	1.08416	0.746868	0.602313
B3-1	WT	0.684227	0.987793	0.746868	0.505943
B3-2	AS	0.920508	1.12892	0.549989	0.492095
B3-3	AS	0.995769	1.15787	0.868403	0.549989
B3-4	WT	1.10344	2.16833	0.819146	0.57822
B4-1	WT	0.737231	2.21651	0.843238	1.37327
B4-2	AS	0.775774	0.289468	0.115787	0.318415
B4-3	AS	0.746827	1.30261	1.3605	1.01314
B4-4	AS	0.984191	1.27366	1.15787	0.260521
B5-1	AS	0.879982	1.88154	1.15787	0.81051
B5-2	WT	0.920334	1.54192	0.819146	0.867331
B5-3	WT	0.876968	1.73466	1.22872	0.795053
B5-4	AS	0.949454	1.12892	0.955244	0.347361
B6-1	WT	0.77096	1.34918	0.746868	0.722775
B6-2	AS	0.839457	0.984191	0.752616	0.318415
B6-3	WT	0.852875	1.34918	1.13235	0.746868
B7-1	AS	1.34313	1.93943	1.59207	0.578936
B7-2	WT	1.03116	1.71057	0.746868	0.505943
B7-3	WT	0.944427	1.75875	0.57822	0.77096
B8-1	AS	0.89735	1.18682	0.578936	0.868403
B8-2	WT	1.0408	1.78285	0.0963701	1.44555
B8-3	WT	0.799872	1.54192	0.361388	0.57822
B9-1	AS	0.71788	0.521042	1.18682	0.839457
B9-2	AS	1.12314	1.53418	0.781563	0.752616
B9-3	WT	1.04562	1.95149	1.73466	0.67459

## Sheet: Fig 1K-L
Extinction: non-cued responses (normalized to acquisition)
Mouse ID	Genotype	ACQ	E1	E2	E3
A1-1	AS	0.722222	3.20988	1.2037	2.00617
A1-2	AS	0.962963	1.2037	2.80864	1.2037
A1-3	AS	0.641975	0.401235	0.401235	0
A1-4	AS	0.641975	2.40741	2.00617	1.2037
A2-1	AS	0.0802469	0	2.00617	0.401235
A2-2	WT	1.19118	3.97059	2.20588	0.882353
A2-3	WT	1.27941	1.54412	2.20588	1.76471
A2-4	WT	0.308824	0.882353	0.220588	2.20588
A3-1	AS	0.882716	0.401235	0.401235	0.802469
A3-2	WT	0.661765	11.0294	3.08824	1.98529
A3-3	AS	0.561728	2.00617	1.2037	1.2037
A3-4	AS	1.12346	0.802469	0.401235	1.60494
A4-1	WT	0.485294	1.98529	0.661765	1.10294
A4-2	AS	0.722222	0.401235	2.00617	0.401235
A4-3	AS	0.401235	0.401235	0.401235	1.2037
A4-4	AS	1.44444	2.00617	0.802469	2.00617
A5-1	WT	0.75	0.661765	0.661765	0.220588
A5-2	WT	1.36765	2.64706	5.29412	1.76471
A5-3	WT	1.10294	0.441176	2.64706	1.10294
A5-4	WT	1.45588	2.64706	1.54412	2.42647
A6-1	WT	0.705882	2.64706	3.08824	2.20588
A6-2	WT	2.29412	1.98529	1.32353	0.441176
A6-3	WT	0.970588	2.64706	0.441176	0.441176
A6-4	WT	0.882353	0.661765	1.10294	0.882353
B1-1	AS	2.64815	4.41358	4.41358	3.61111
B1-2	WT	1.27941	1.10294	1.10294	2.42647
B1-3	WT	1.94118	6.17647	5.51471	3.08824
B1-4	AS	2.00617	7.62346	11.6358	1.2037
B2-1	WT	0.573529	1.98529	2.64706	3.52941
B2-2	AS	1.52469	2.00617	2.00617	2.00617
B2-3	WT	0.838235	0.661765	0.661765	0.882353
B2-4	WT	0.970588	1.98529	1.10294	0.661765
B3-1	WT	0.970588	1.10294	2.64706	1.98529
B3-2	AS	2.24691	3.61111	2.00617	2.00617
B3-3	AS	1.04321	4.01235	0.802469	2.40741
B3-4	WT	0.705882	3.75	7.27941	1.54412
B4-1	WT	0.661765	1.98529	2.42647	5.73529
B4-2	AS	0.882716	0.401235	0	0.802469
B4-3	AS	0.882716	0.401235	4.41358	6.01852
B4-4	AS	0.240741	1.2037	1.2037	0.401235
B5-1	AS	0.561728	4.01235	2.40741	2.00617
B5-2	WT	1.01471	2.86765	2.20588	1.76471
B5-3	WT	1.14706	1.10294	1.98529	1.10294
B5-4	AS	1.3642	1.60494	0.802469	2.00617
B6-1	WT	0.573529	0.882353	1.10294	1.54412
B6-2	AS	0.320988	0.802469	0.401235	0.802469
B6-3	WT	1.19118	1.54412	2.64706	1.98529
B7-1	AS	2.16667	2.40741	2.40741	1.60494
B7-2	WT	0.617647	2.42647	1.10294	1.10294
B7-3	WT	0.75	5.73529	2.86765	1.54412
B8-1	AS	0.401235	0.401235	4.81481	1.2037
B8-2	WT	1.27941	3.08824	1.98529	12.7941
B8-3	WT	1.23529	3.97059	0.882353	0.441176
B9-1	AS	0.481481	0	1.60494	2.40741
B9-2	AS	1.04321	2.00617	2.00617	0.401235
B9-3	WT	0.794118	2.42647	3.52941	2.64706

## Sheet: Fig 1M-N
Extinction: accuracy (normalized to acquisition)
Mouse ID	Genotype	ACQ	E1	E2	E3
A1-1	AS	1.01178	0.887938	0.959381	0.951181
A1-2	AS	1.00286	1.02784	0.920268	0.963071
A1-3	AS	1.02738	1.04035	0.972799	1.07008
A1-4	AS	1.0105	0.946608	0.932889	0.963071
A2-1	AS	1.06445	1.07008	0.864295	0.99874
A2-2	WT	0.977991	0.922164	0.89473	0.834717
A2-3	WT	0.976404	1.03582	0.939057	0.910601
A2-4	WT	1.06916	1.06658	1.09155	0.881091
A3-1	AS	1.00565	1.03556	1.0032	0.875519
A3-2	WT	1.03965	0.736958	0.834717	0.826768
A3-3	AS	1.02836	0.925474	0.978358	0.951181
A3-4	AS	0.977756	1.03765	1.03045	0.932004
A4-1	WT	1.04685	0.997823	1.00525	0.939057
A4-2	AS	1.01635	1.04519	0.921457	1.02144
A4-3	AS	1.03413	1.04731	1.03318	0.840776
A4-4	AS	1.00462	0.974536	1.02031	0.891732
A5-1	WT	1.01646	1.06159	1.06312	1.05996
A5-2	WT	0.971505	0.970877	0.725841	0.890365
A5-3	WT	0.967364	1.05588	0.82262	0.803802
A5-4	WT	0.985802	0.946013	0.95065	0.898176
A6-1	WT	1.02918	0.834717	0.758834	0.741971
A6-2	WT	0.909341	0.977597	0.997823	0.982021
A6-3	WT	1.0238	0.96119	1.02392	1.03876
A6-4	WT	1.04873	1.08232	0.958379	0.995803
B1-1	AS	0.916774	0.915199	0.894394	0.846109
B1-2	WT	0.93315	0.986484	0.962557	0.890365
B1-3	WT	0.876688	0.869497	0.726513	0.70292
B1-4	AS	0.946191	0.809419	0.633004	0.535039
B2-1	WT	1.04215	0.989295	0.941733	0.87865
B2-2	AS	0.953308	0.960887	0.929279	0.936319
B2-3	WT	1.01355	1.02734	1.02021	0.865633
B2-4	WT	1.0463	0.927464	0.958379	0.993711
B3-1	WT	0.96729	0.991983	0.802364	0.77907
B3-2	AS	0.901015	0.869439	0.847146	0.826879
B3-3	AS	0.988265	0.856063	1.0032	0.81326
B3-4	WT	1.06768	0.936132	0.564784	0.861644
B4-1	WT	1.01975	1.01378	0.846815	0.76432
B4-2	AS	0.996356	0.972799	1.07008	0.905451
B4-3	AS	0.982774	1.04682	0.867133	0.749055
B4-4	AS	1.05364	1.00178	0.995422	0.963071
B5-1	AS	1.02289	0.927402	0.930503	0.907946
B5-2	WT	0.992542	0.925055	0.860012	0.910601
B5-3	WT	0.969911	1.04069	0.946013	0.966515
B5-4	AS	0.974127	0.970537	1.00893	0.75535
B6-1	WT	1.02748	1.03876	0.958379	0.902397
B6-2	AS	1.04811	1.01063	1.03045	0.905451
B6-3	WT	0.970457	0.989295	0.886593	0.862541
B7-1	AS	0.95984	0.982127	0.964825	0.891732
B7-2	WT	1.04312	0.963658	0.958379	0.898926
B7-3	WT	1.01817	0.820665	0.721918	0.913195
B8-1	AS	1.03507	1.0446	0.668799	0.972799
B8-2	WT	0.967694	0.935895	0.342448	0.56591
B8-3	WT	0.955626	0.868649	0.87865	1.02734
B9-1	AS	1.02289	1.07008	0.974961	0.886637
B9-2	AS	1.01491	0.977831	0.902879	1.03045
B9-3	WT	1.02621	0.979886	0.910601	0.77907

## Sheet: Fig 2A
Acquisition: days to criteria (by cohort)
Mouse ID	Genotype	Cohort	Days to criteria
A1-1	AS	1	25
A1-2	AS	1	14
A1-3	AS	1	32
A1-4	AS	1	14
A2-1	AS	1	11
A2-2	WT	1	8
A2-3	WT	1	14
A2-4	WT	1	11
A3-1	AS	1	12
A3-2	WT	1	17
A3-3	AS	1	35
A3-4	AS	1	20
A4-1	WT	1	17
A4-2	AS	1	30
A4-3	AS	1	38
A4-4	AS	1	28
A5-1	WT	1	18
A5-2	WT	1	18
A5-3	WT	1	33
A5-4	WT	1	18
A6-1	WT	1	11
A6-2	WT	1	12
A6-3	WT	1	11
A6-4	WT	1	9
B1-1	AS	2	20
B1-2	WT	2	14
B1-3	WT	2	15
B1-4	AS	2	21
B2-1	WT	2	19
B2-2	AS	2	26
B2-3	WT	2	20
B2-4	WT	2	27
B3-1	WT	2	20
B3-2	AS	2	39
B3-3	AS	2	18
B3-4	WT	2	23
B4-1	WT	2	21
B4-2	AS	2	24
B4-3	AS	2	17
B4-4	AS	2	29
B5-1	AS	2	13
B5-2	WT	2	17
B5-3	WT	2	19
B5-4	AS	2	37
B6-1	WT	2	22
B6-2	AS	2	21
B6-3	WT	2	20
B7-1	AS	2	17
B7-2	WT	2	10
B7-3	WT	2	11
B8-1	AS	2	13
B8-2	WT	2	25
B8-3	WT	2	13
B9-1	AS	2	14
B9-2	AS	2	25
B9-3	WT	2	10

[truncated: 19 more sheets: Fig 2B, Fig 2C, Fig 2D, Fig 2E, Fig 2F, Fig 3A, Fig 3B, Fig 3C, Fig 3D, Fig 3E, Fig 3F, Fig 4A, Fig 4D, Fig 4E, Fig 4F, Fig 4G, Fig S1A-B, Fig S1C-D, Fig S1E-F]
